# Supplementary material
Source: publisher figshare collection journal article supplement (https://tandf.figshare.com/ndownloader/files/15264686)
Supplement: Supplementary file 1 [file 15264686]

## SUPPLEMENTARY MATERIAL

### A Novel Cytotoxic Flavonoid C-Glycoside from *Premna fulva*

Kui-Wu Wang <sup>\*,a</sup>, Sheng-Nan Yan <sup>a</sup>, Ting-Ting Zhang <sup>a</sup>, Hai-Jiang Zhang <sup>b</sup>, Bin Wu <sup>c</sup>, and Hong Wang <sup>d</sup>

<sup>a</sup>*School of Food Science and Biotechnology, Zhejiang Gongshang University, Hangzhou 310018, P. R. China*

<sup>b</sup>*Jiangsu Key Laboratory of Regional Resource Exploitation and Medicinal Research, Huaiyin Institute of Technology, Huaian 223003, P. R. China*

<sup>c</sup>*Ocean College, Zhejiang University, Hangzhou 310058, P. R. China*

<sup>d</sup>*School of Pharmaceutical Science, Zhejiang University of Technology, Hangzhou 310014, P. R. China*

**Abstract:** *Premna fulva* Craib, locally known as “Zhangu” in China, is a kind of traditional medicinal plant. A phytochemical investigation on this plant led to the isolation of a novel flavonoid glycoside along with three known analogues. The chemical structure of the new compound was determined by spectral and chemical analysis as apigenin 8-C- $\beta$ -D-xylopyranoside (**1**). Compound **1** showed weak inhibitory activities *in vitro* against to four tumor cell lines (HL-60, Bcap37, SMMC7721, and P388) with IC<sub>50</sub> values of 12.58, 19.31, 31.02, and 48.19  $\mu$ g/mL, respectively. The result might be helpful to explain the application of *P. fulva* in Traditional Chinese Medicine.

\* Corresponding authors: Kui-Wu Wang

Fax: 0086-571-28008900

E-mail: [wkwnpc@zjgsu.edu.cn](mailto:wkwnpc@zjgsu.edu.cn) (K.-W. Wang)

- Figure S1. The  $^1\text{H}$  NMR (500 MHz,  $\text{DMSO-}d_6$ ) of the new compound **1**
- Figure S2. The  $^{13}\text{C}$  NMR (125 MHz,  $\text{DMSO-}d_6$ ) of the new compound **1**
- Figure S3. The DEPT 135 spectrum of the new compound **1**
- Figure S4. The  $^1\text{H}$ - $^1\text{H}$  COSY spectrum of the new compound **1**
- Figure S5. The HSQC spectrum of the new compound **1**
- Figure S6. The HMBC spectrum of the new compound **1**
- Figure S7. The HRESI-MS spectrum of compound **1**
- Figure S8. The ESI-MS spectrum of compound **1**
- Figure S9. Key  $^1\text{H}$ - $^1\text{H}$  COSY and HMBC correlations of compound **1**

Table S1. NMR data of compound **1** ( $\text{DMSO-}d_6$ )

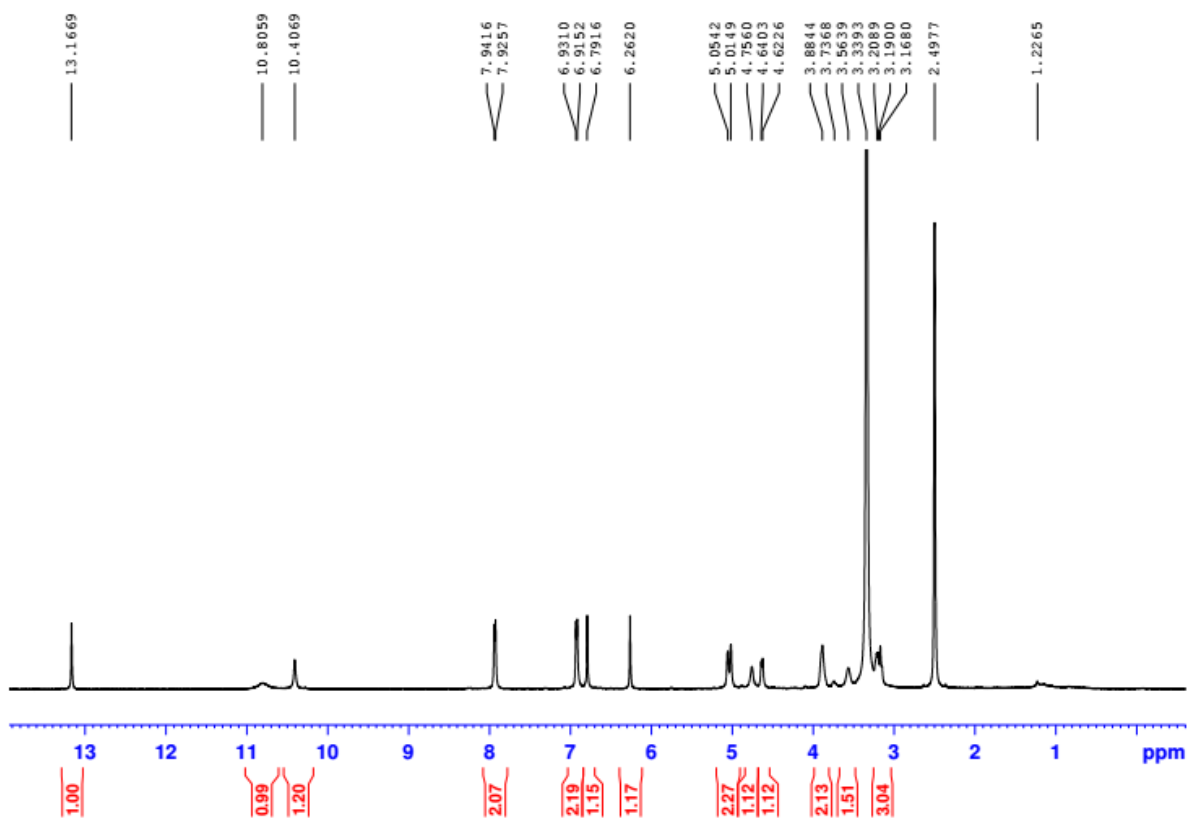

Figure S1. The <sup>1</sup>H NMR (500 MHz, DMSO-*d*<sub>6</sub>) of the new compound 1

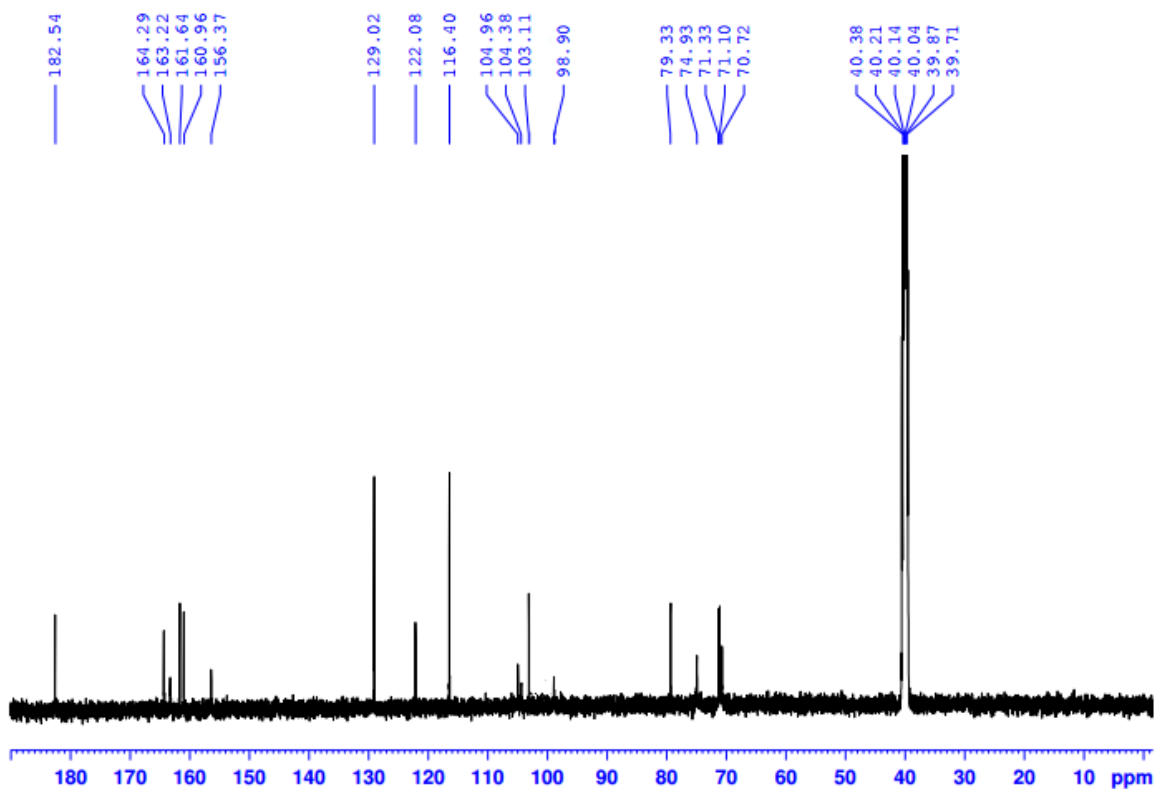

Figure S2. The <sup>13</sup>C NMR (125 MHz, DMSO-*d*<sub>6</sub>) of the new compound 1

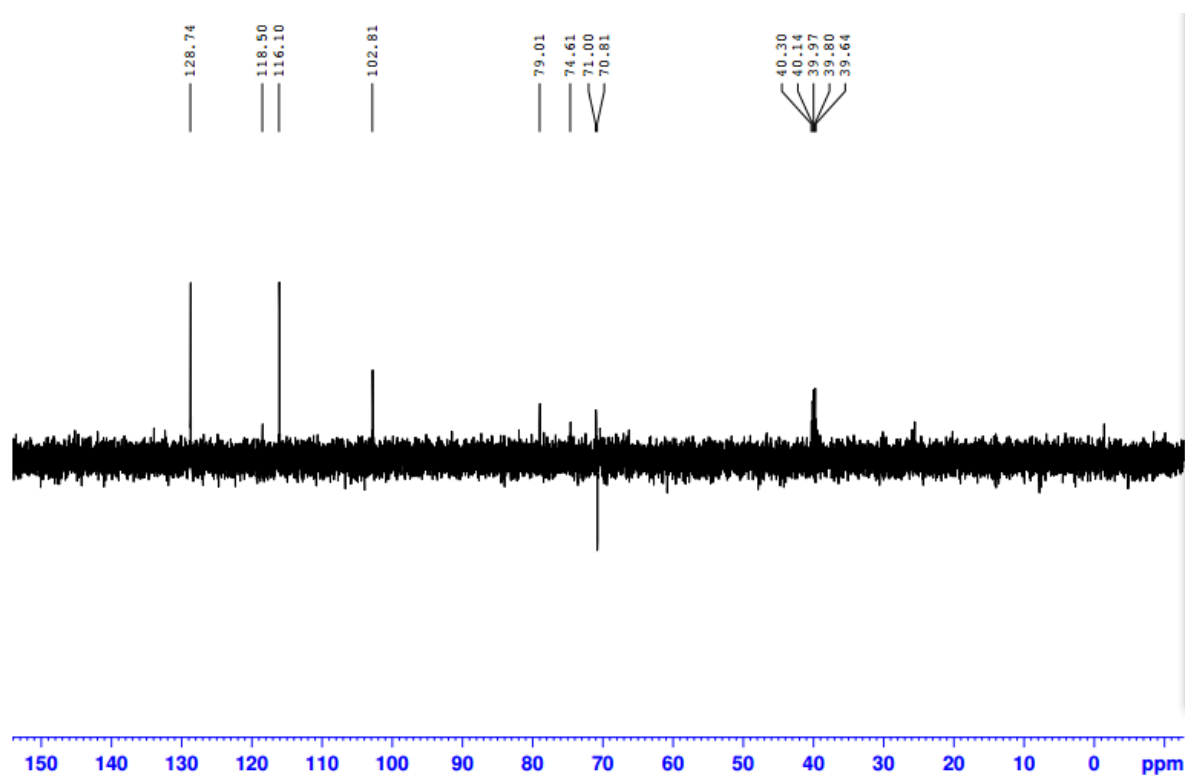

Figure S3. The DEPT 135 spectrum of the new compound **1**

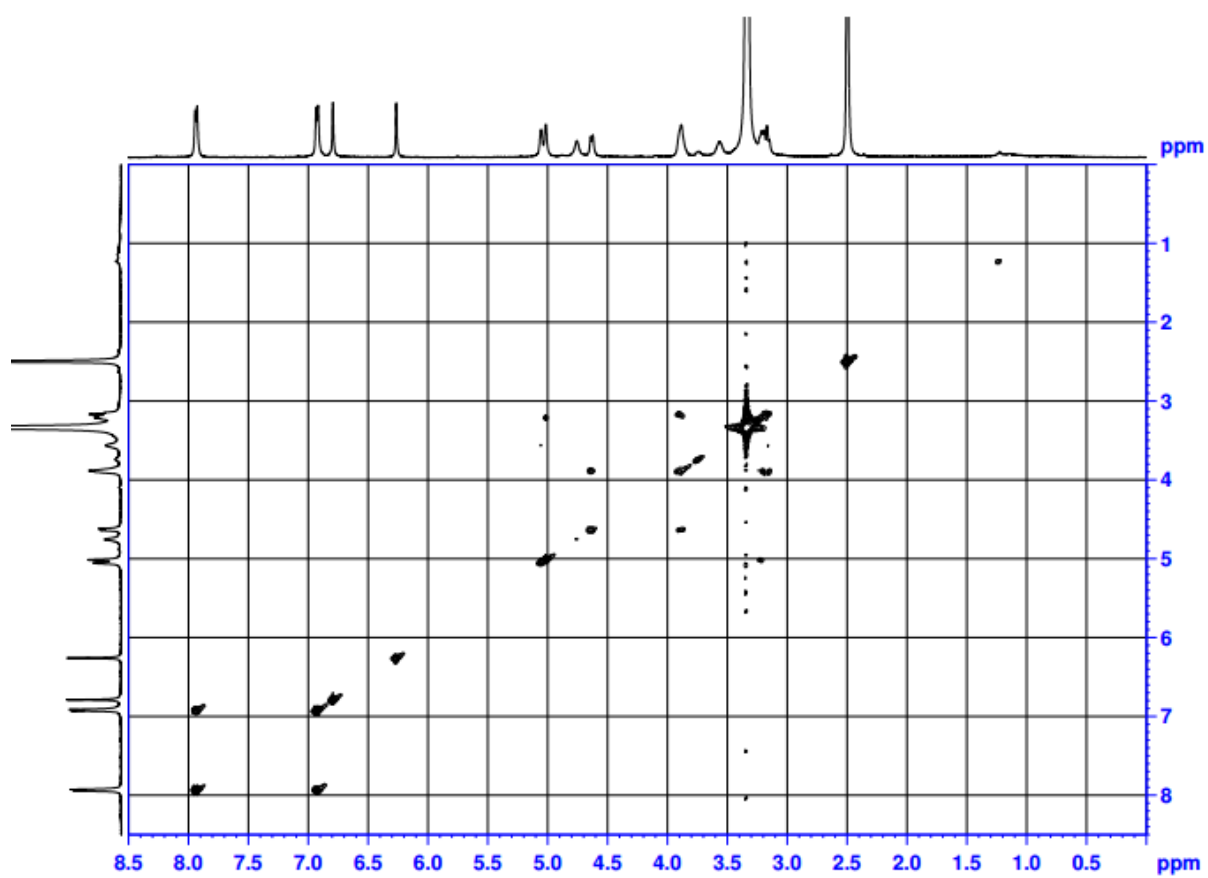

Figure S4. The  $^1\text{H}$ - $^1\text{H}$  COSY spectrum of the new compound **1**

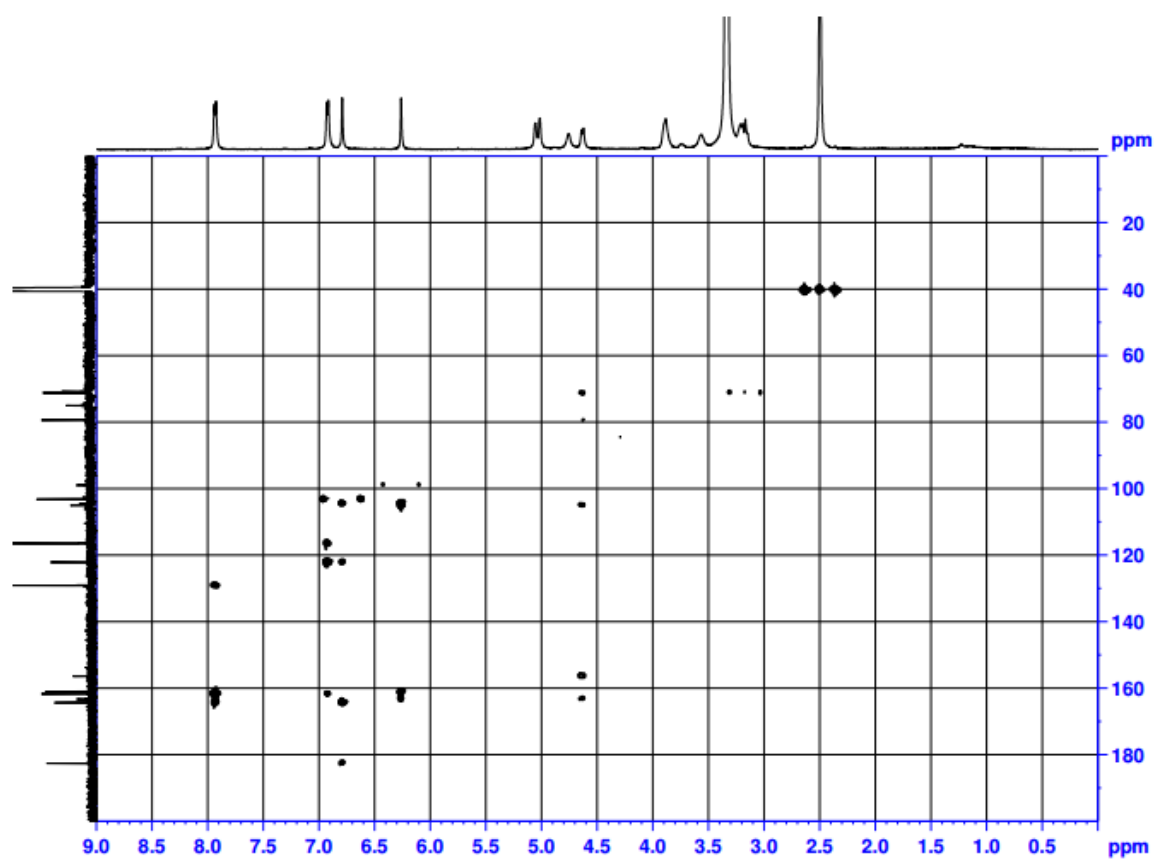

Figure S5. The HSQC spectrum of the new compound **1**

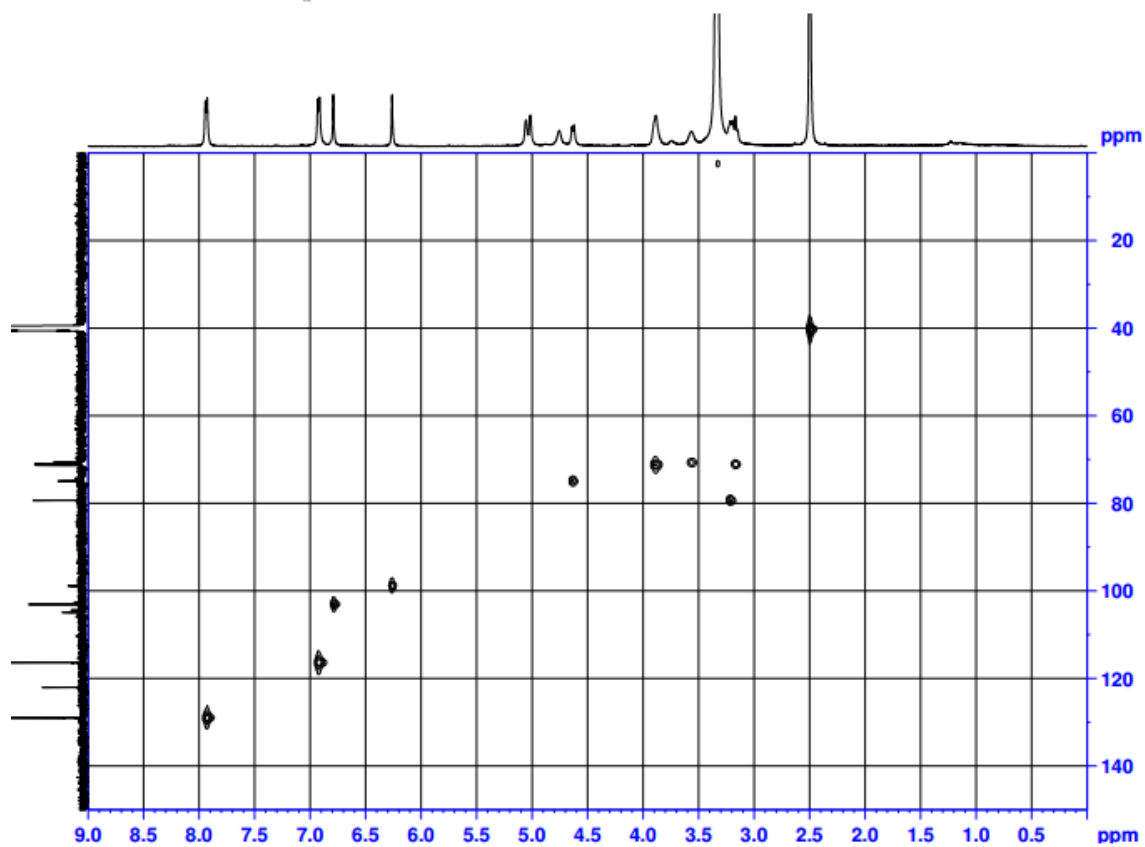

Figure S6. The HMBC spectrum of the new compound **1**

HW-W6

20170721-13 76 (0.956)

1: TOF MS ES+  
2.82e5

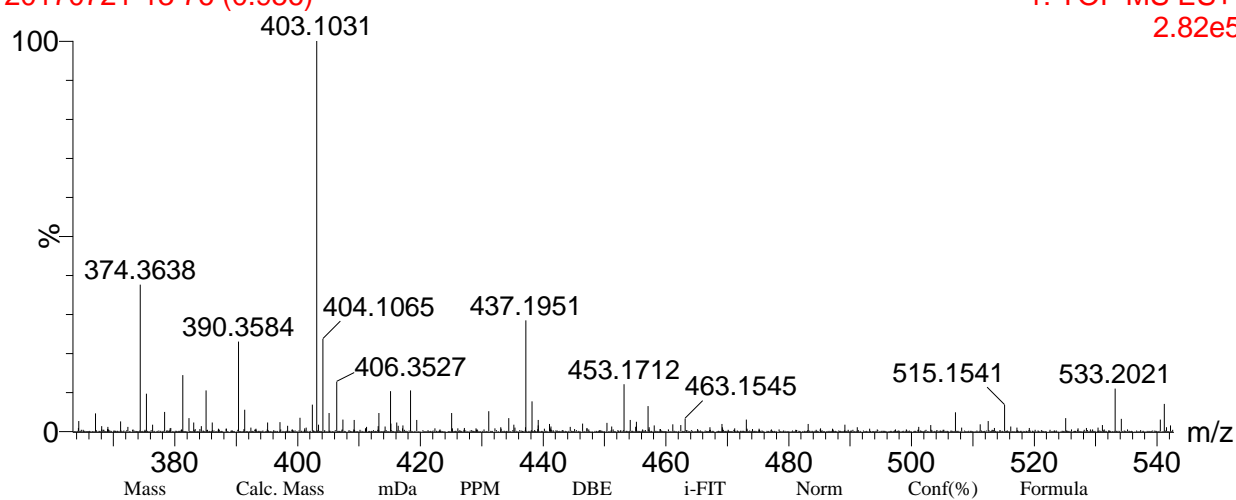

Figure S7. The HRESI-MS spectrum of compound **1**

HM-W-6\_170416130932 #722 RT: 5.29 AV: 1 NL: 1.12E4  
T: ITMS - c ESI Full ms [110.00-500.00]

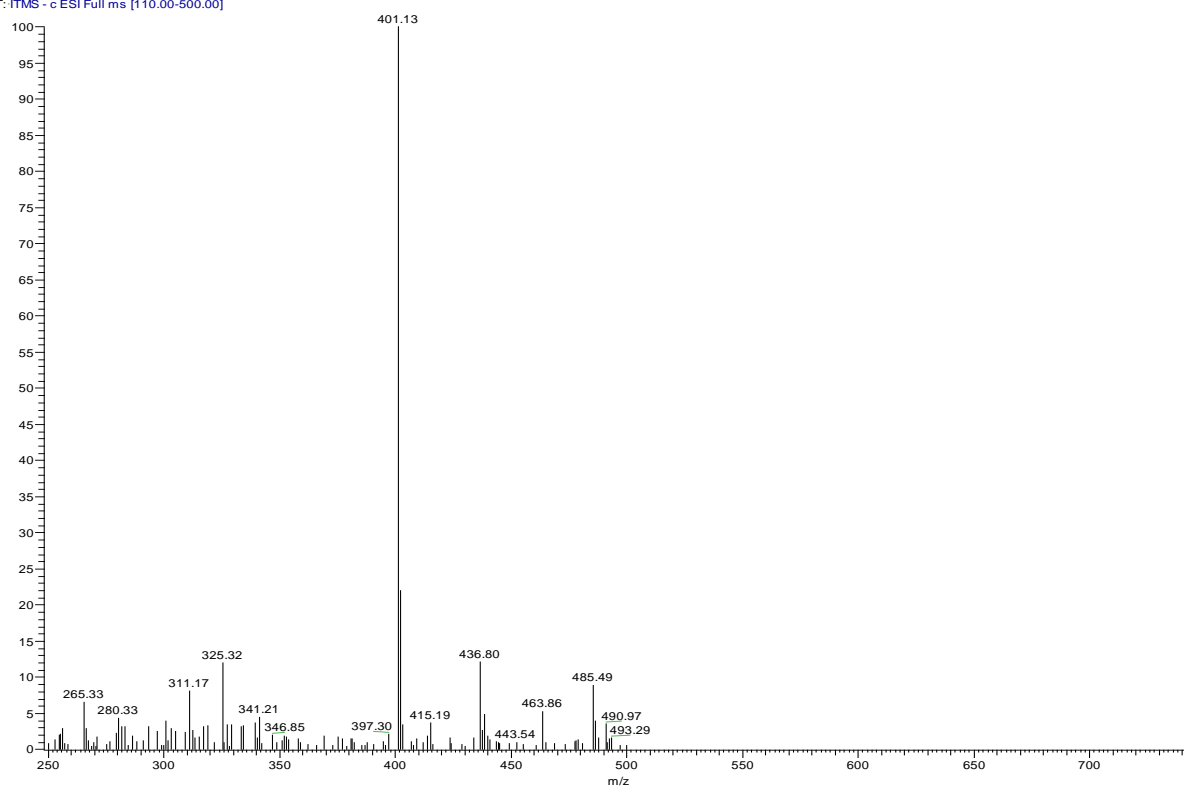

Figure S8. The ESI-MS spectrum of compound **1**

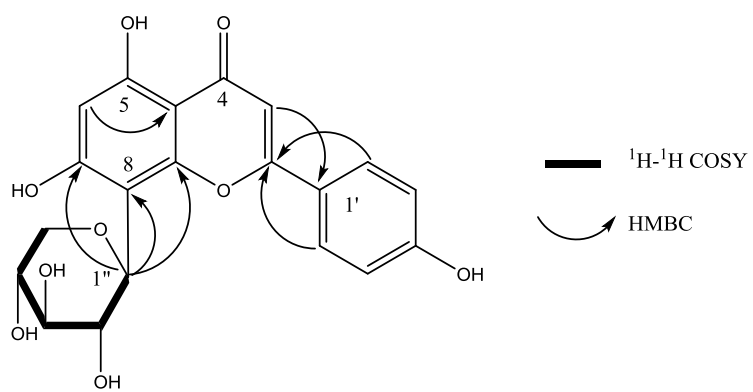

**1**

Figure S9. Key  $^1\text{H}$ - $^1\text{H}$  COSY and HMBC correlations of compound **1**.

Table S1. NMR data of compound **1** (DMSO-*d*<sub>6</sub>)

| No.    | $\delta_{\text{H}}$ (ppm)    | $\delta_{\text{C}}$ (ppm) | $^1\text{H}$ - $^1\text{H}$ COSY | HMBC (H $\rightarrow$ C) |
|--------|------------------------------|---------------------------|----------------------------------|--------------------------|
| 2      | -                            | 164.3                     |                                  |                          |
| 3      | 6.80 (1H, s)                 | 103.1                     |                                  | C-1', 4', 10             |
| 4      | -                            | 182.5                     |                                  |                          |
| 5      | -                            | 161.0                     |                                  |                          |
| 6      | 6.26 (1H, s)                 | 98.9                      |                                  | C-5, 8, 10               |
| 7      | -                            | 163.2                     |                                  |                          |
| 8      | -                            | 104.7                     |                                  |                          |
| 9      | -                            | 156.4                     |                                  |                          |
| 10     | -                            | 104.4                     |                                  |                          |
| 1'     | -                            | 122.1                     |                                  |                          |
| 2', 6' | 7.94 (2H, d, $J=8.0$ Hz)     | 129.0                     | H-3', 5'                         | C-2, 4'                  |
| 3', 5' | 6.93 (2H, d, $J=8.0$ Hz)     | 116.4                     | H-2', 6'                         | C-1'                     |
| 4'     | -                            | 161.6                     |                                  |                          |
| D-Xyl  |                              |                           |                                  |                          |
| 1''    | 4.64 (1H, d, $J=9.8$ Hz)     | 74.9                      | H-2''                            | C-7, 8, 9, 3''           |
| 2''    | 3.88 (1H, s)                 | 71.3                      | H-1'', 3''                       |                          |
| 3''    | 3.19 (1H, m)                 | 79.3                      | H-2'', 4''                       |                          |
| 4''    | 3.60 (1H, s)                 | 70.7                      | H-3'', 5''                       |                          |
| 5''    | 3.17 (1H, m)<br>3.88 (1H, s) | 71.1                      | H-4''                            |                          |
| 5-OH   | 13.17 (1H, s)                | -                         | -                                |                          |
| 7-OH   | 10.81 (1H, s)                | -                         | -                                |                          |
| 4'-OH  | 10.41 (1H, s)                | -                         | -                                |                          |

$^1\text{H}$ -NMR and  $^{13}\text{C}$ -NMR were measured at 500 MHz and 125 MHz, respectively.
